# Supplementary material
Source: PubMed Central journal article supplement (PMC1959419)

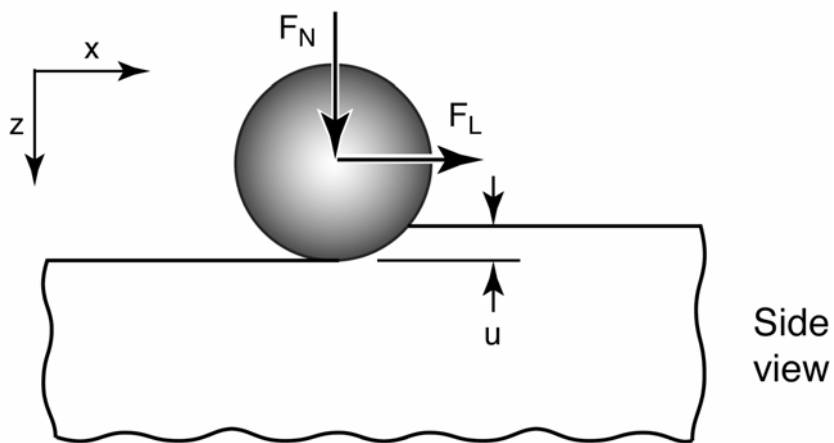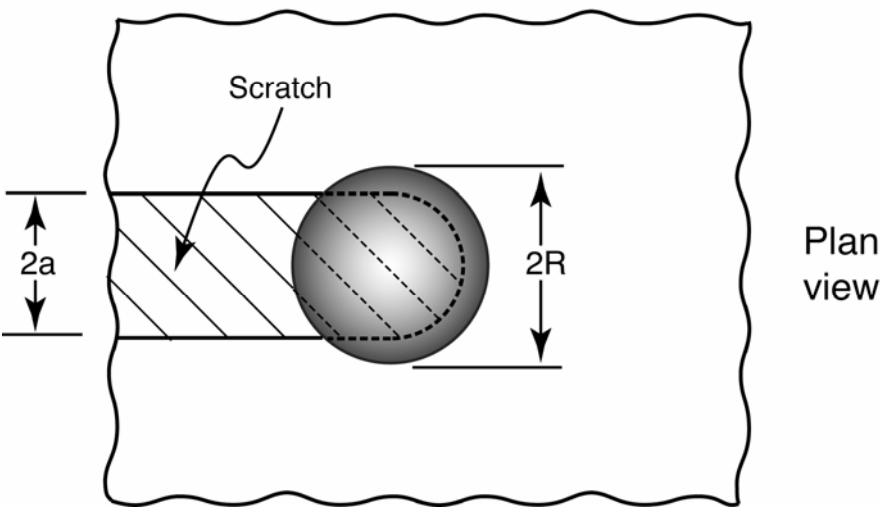

Supplement: pnas_0702034104_1.pdf [file pnas_0702034104_1.pdf]
